# Supplementary material for: Improved lithium ion battery performance by mesoporous Co3O4 nanosheets grown on self-standing NiSix nanowires on nickel foam
Source: Royal Society of Chemistry journal article supplement (doi:10.1039/c4ta00967c), 2014-01-01
Supplement: c4ta00967c1.pdf [file c4ta00967c1.pdf]

## Supporting Information

### Improved lithium ion battery performance by mesoporous $\text{Co}_3\text{O}_4$ nanosheets grown on self-standing $\text{NiSi}_x$ nanowires on nickel foam

Huixin Chen<sup>a, #</sup>, Qiaobao Zhang<sup>b, #</sup>, Jiexi Wang<sup>c</sup>, Daguo Xu<sup>b</sup>, Xinhai Li<sup>c</sup>, Yong Yang<sup>a, \*</sup>,

Kaili Zhang<sup>b, \*</sup>

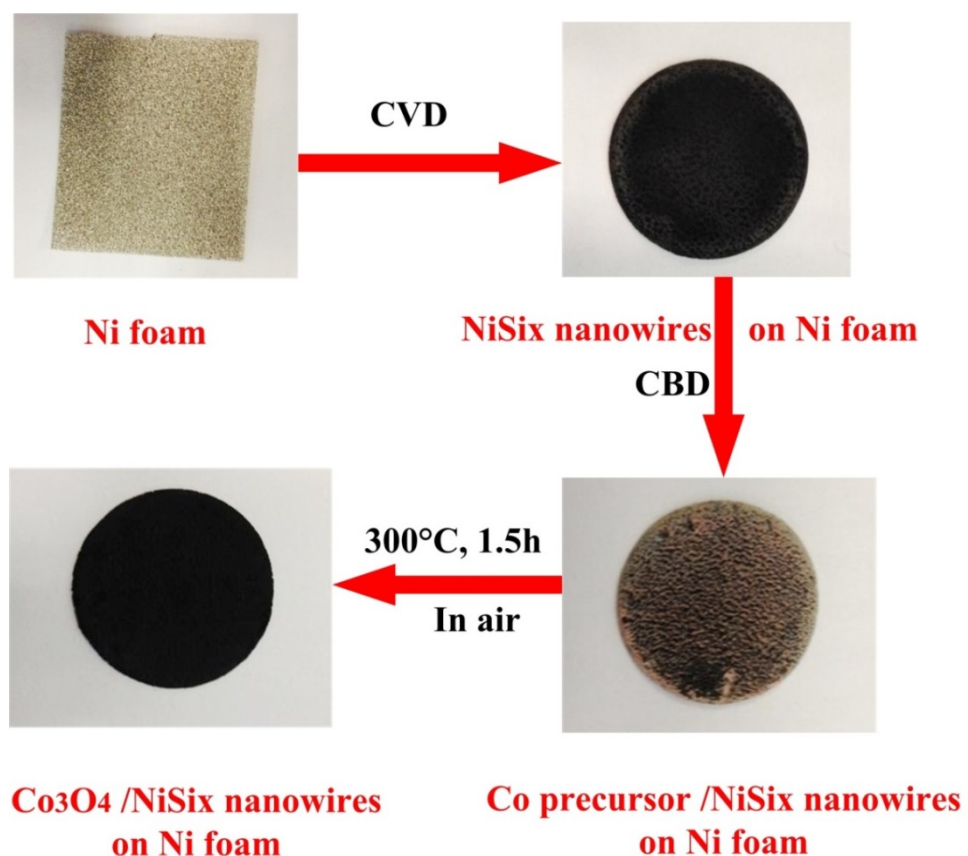

Figure S1. Photographs of the synthesis procedure.

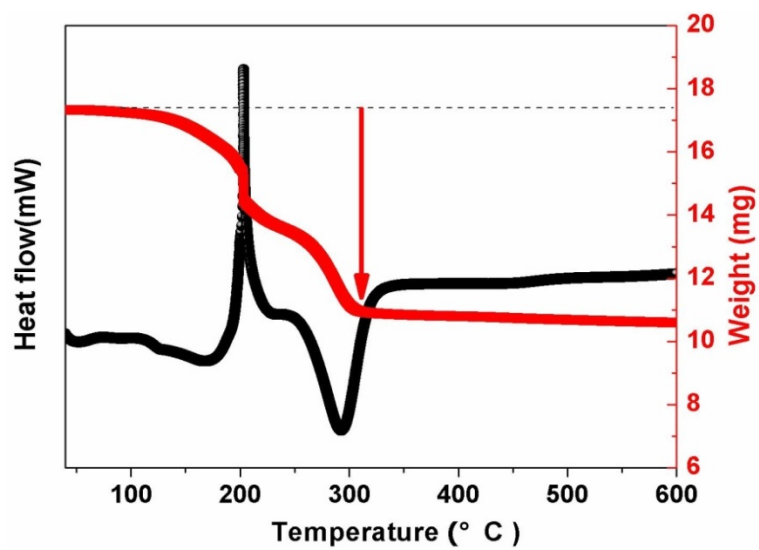

Figure S2. DTA-TG curves of Co-precursor (cobalt hydroxide carbonate).

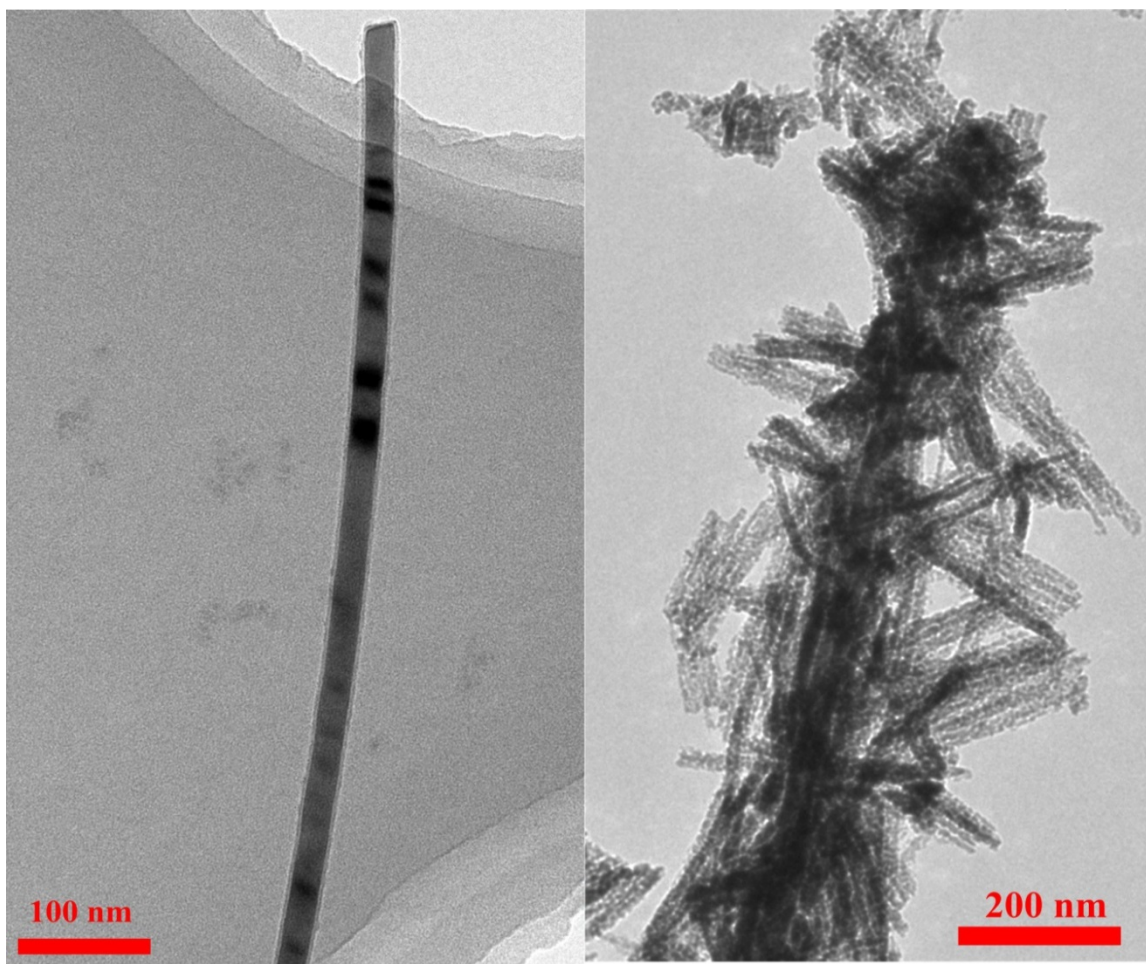

Figure S3. (a) TEM image of an individual  $\text{NiSi}_x$  nanowire and (b) TEM image of a  $\text{NiSi}_x/\text{Co}_3\text{O}_4$  core/shell nanowire.

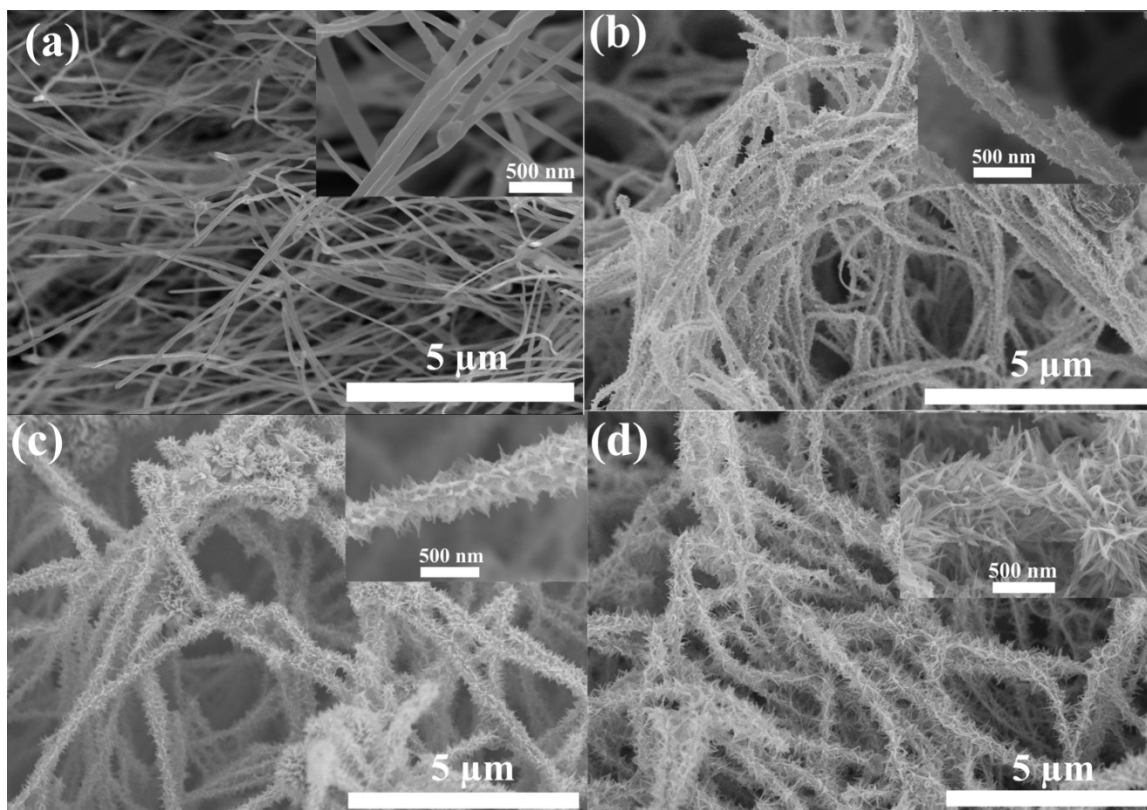

Figure S4. SEM images of  $\text{NiSi}_x/\text{Co}_3\text{O}_4$  core/shell nanowire arrays on nickel foam prepared at different reaction time of CBD: (a) 0 h, (b) 0.5 h, (c) 1h, and (d) 2h.

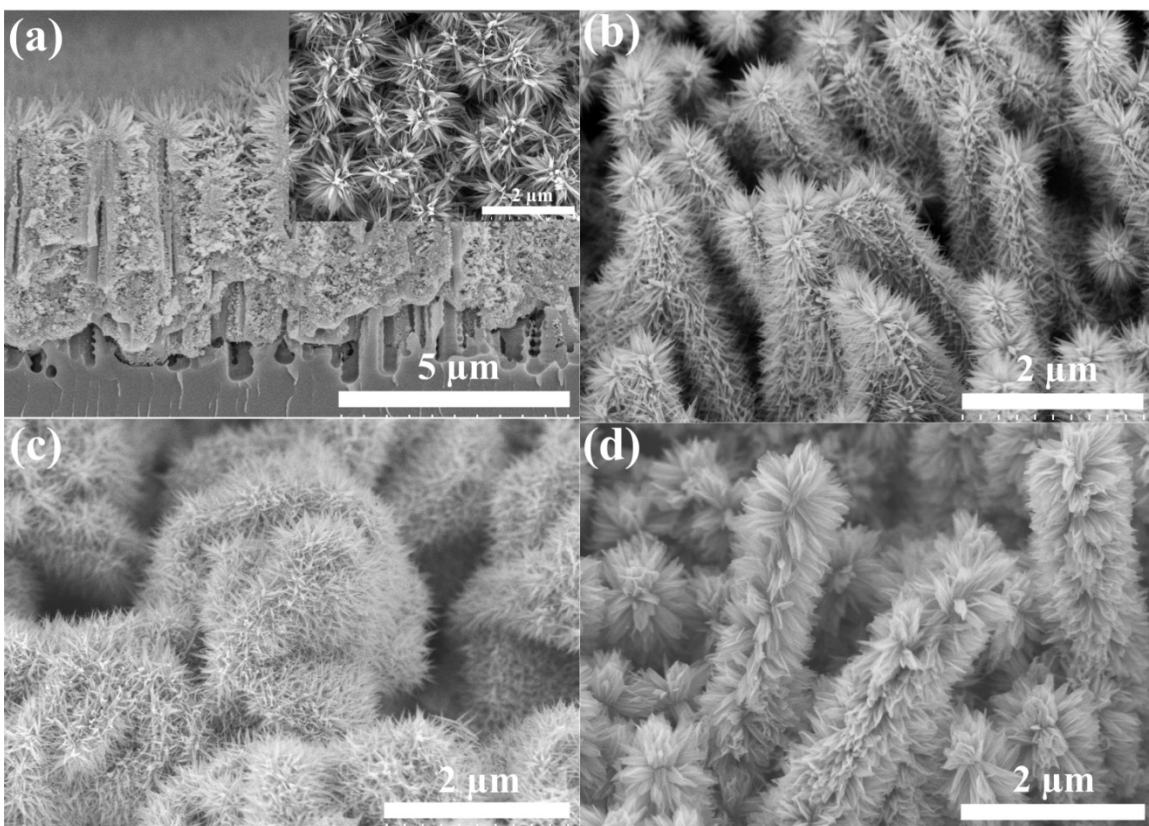

Figure S5. SEM images of different 3D Co<sub>3</sub>O<sub>4</sub>-based heterohierarchical nanostructures: (a) Co<sub>3</sub>O<sub>4</sub>/Si nanowires, (b) Co<sub>3</sub>O<sub>4</sub>/CuO nanoneedles, (c) Co<sub>3</sub>O<sub>4</sub>/CuO nanoflowers, and (d) Co<sub>3</sub>O<sub>4</sub>/CuO nanowires.

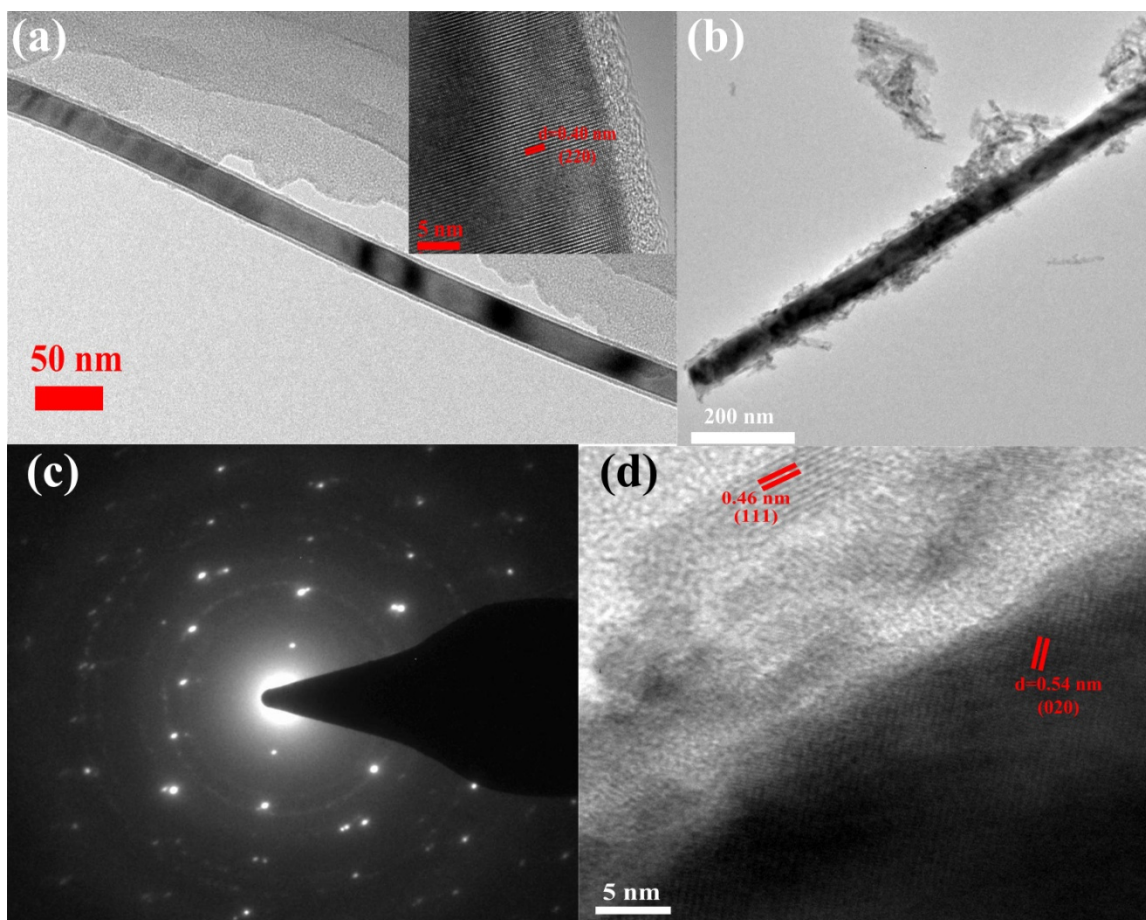

Figure S6. (a) TEM image of an individual  $\text{NiSi}_x$  nanowire, the inset is its HRTEM, (b) TEM image of an individual  $\text{NiSi}_x/\text{Co}_3\text{O}_4$  core/shell nanowire with the growth of  $\text{Co}_3\text{O}_4$  for 0.5h, (c) the corresponding SAED of an individual  $\text{NiSi}_x/\text{Co}_3\text{O}_4$  core/shell nanowire with the growth of  $\text{Co}_3\text{O}_4$  for 0.5h, and (d) HRTEM of  $\text{NiSi}_x/\text{Co}_3\text{O}_4$  core/shell nanowire with the growth of  $\text{Co}_3\text{O}_4$  for 0.5 h.

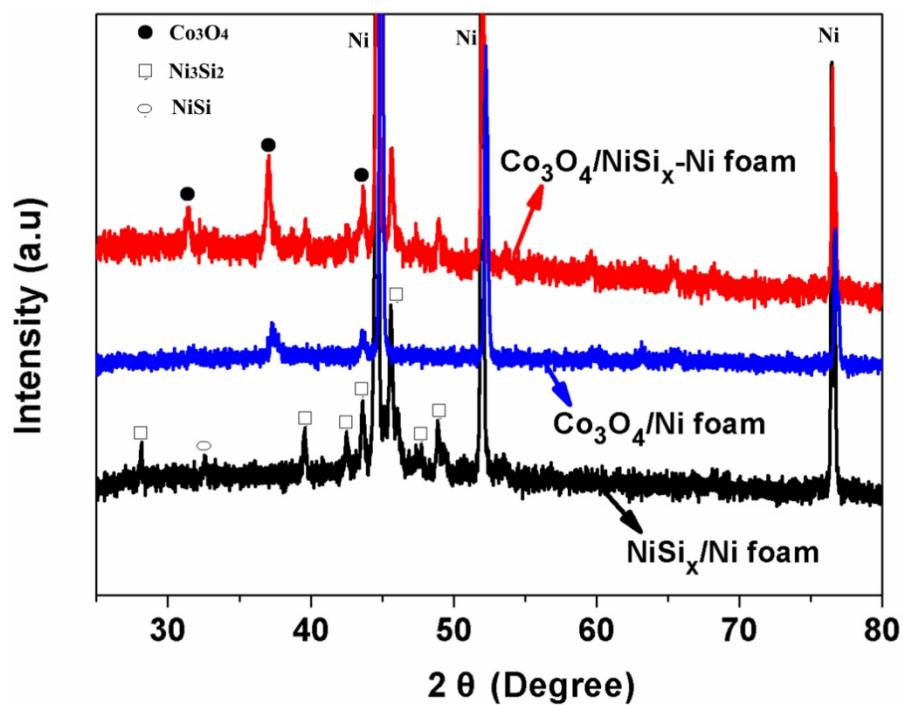

Figure S7. XRD patterns of the as-prepared  $\text{NiSi}_x$  nanowires,  $\text{Co}_3\text{O}_4$  nanosheets, and  $\text{NiSi}_x/\text{Co}_3\text{O}_4$  core/shell nanowire arrays on nickel foam.

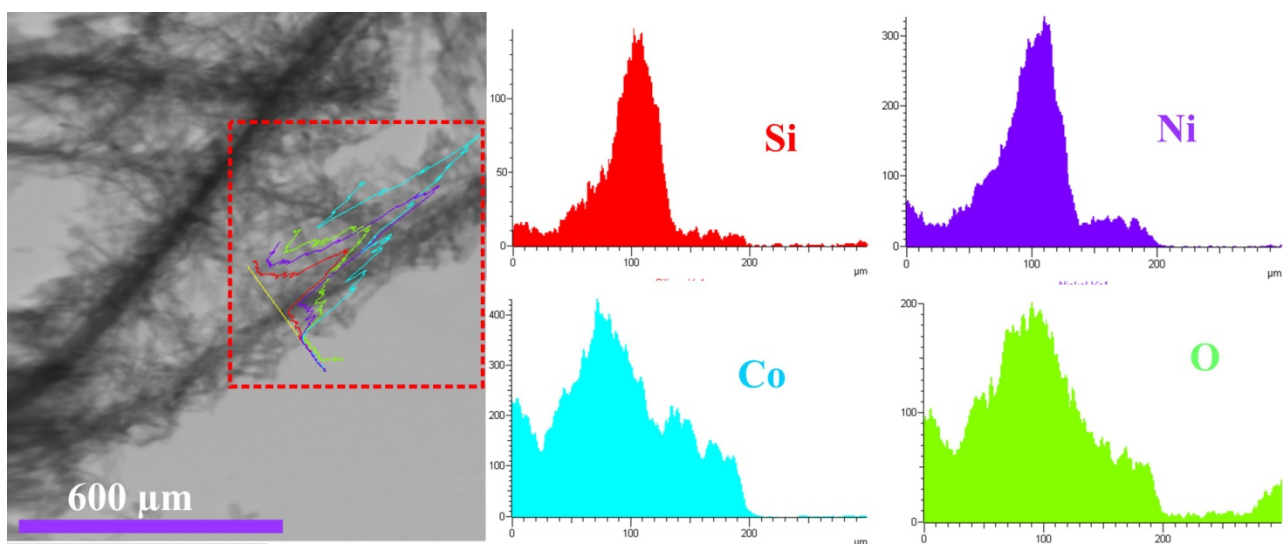

Figure S8. TEM scan line of  $\text{NiSi}_x/\text{Co}_3\text{O}_4$  core/shell nanowire with the growth of  $\text{Co}_3\text{O}_4$  for 2h and its corresponding element mapping distribution.

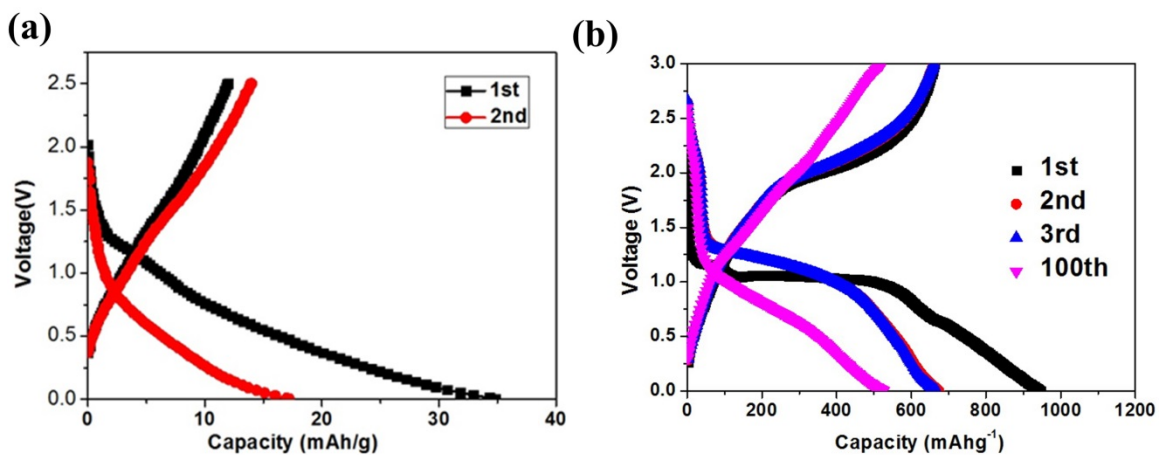

Figure S9. (a) The charge/discharge curve of  $\text{NiSi}_x$  grown on Ni foam after the same heat treatment for the 1<sup>st</sup> and 2<sup>nd</sup> cycles and (b) the discharge-charge curves of  $\text{Co}_3\text{O}_4/\text{Ni}$  foam at a current density of 400 mA g<sup>-1</sup>.
